# Supplementary material for: Differences in Physical Activity and Diet Patterns between Non-Rural and Rural Adults
Source: PubMed Central journal article supplement (PMC6267585; doi:10.3390/nu10111601), 2018-11-01
Supplement: nutrients-10-01601-s001.pdf [file nutrients-10-01601-s001.pdf]

**Table S1.** Changes made to food categories for analysis.

| Food                                                   | Original Category on FFQ              | Category Used for Analysis |
|--------------------------------------------------------|---------------------------------------|----------------------------|
| Cream, e.g., coffee, whipped or sour cream             | Dairy Foods                           | Condiments                 |
| Non-dairy coffee whitener                              | Dairy Foods                           | Condiments                 |
| Spreads added to food or bread; exclude use in cooking | Dairy Foods                           | Condiments                 |
| Cream cheese                                           | Dairy Foods                           | Condiments                 |
| Tomatoes (slices)                                      | Vegetables                            | Condiments                 |
| Peppers: green, yellow or red (slices)                 | Vegetables                            | Condiments                 |
| Onions as a garnish or in a salad                      | Vegetables                            | Condiments                 |
| Jams, jellies, preserves, syrup, or honey              | Sweets, Baked Goods,<br>Miscellaneous | Condiments                 |
| Oat bran, added to food                                | Sweets, Baked Goods,<br>Miscellaneous | Condiments                 |
| Other bran (wheat, etc.), added to food                | Sweets, Baked Goods,<br>Miscellaneous | Condiments                 |
| Ketchup or red chili sauce                             | Sweets, Baked Goods,<br>Miscellaneous | Condiments                 |
| Splenda                                                | Sweets, Baked Goods,<br>Miscellaneous | Condiments                 |
| Other artificial sweetener                             | Sweets, Baked Goods,<br>Miscellaneous | Condiments                 |
| Olive oil added to food or bread                       | Sweets, Baked Goods,<br>Miscellaneous | Condiments                 |
| Low-fat or fat-free mayonnaise                         | Sweets, Baked Goods,<br>Miscellaneous | Condiments                 |
| Regular mayonnaise                                     | Sweets, Baked Goods,<br>Miscellaneous | Condiments                 |
| Salad dressing                                         | Sweets, Baked Goods,<br>Miscellaneous | Condiments                 |
| Peanut butter                                          | Sweets, Baked Goods,<br>Miscellaneous | Meat                       |
| Peanuts                                                | Sweets, Baked Goods,<br>Miscellaneous | Meat                       |
| Walnuts                                                | Sweets, Baked Goods,<br>Miscellaneous | Meat                       |
| Other nuts                                             | Sweets, Baked Goods,<br>Miscellaneous | Meat                       |
| Popcorn                                                | Sweets, Baked Goods,<br>Miscellaneous | Starches                   |
| Pretzels                                               | Sweets, Baked Goods,<br>Miscellaneous | Starches                   |
